# Supplementary material for: Considering cell volume in dopant screening for improving Li-ion mobility in an amorphous LiPON solid-state electrolyte: an ab initio study
Source: Royal Society of Chemistry journal article supplement (doi:10.1039/d3ra00557g), 2023-01-01
Supplement: d3ra00557g1.pdf [file d3ra00557g1.pdf]

## Supporting Information

### Cell Volume-Wise Dopant Screening for Amorphous LiPON Solid State Electrolyte toward Improved Li-ion Mobility: An *ab initio* study

Heechae Choi,<sup>a,b</sup> Seulgi Ji,<sup>b</sup> Haneol Cho,<sup>c</sup> Chansoo Kim,<sup>c</sup> Patrick Joohyun Kim,<sup>d</sup> Hyunjung Park<sup>e</sup> and Junghyun Choi,<sup>f,\*</sup>

<sup>a</sup>Department of Chemistry, Xi'an Jiaotong-Liverpool University, Suzhou Industrial Park, 215123, Suzhou, China

<sup>b</sup>Theoretical Materials & Chemistry Group, Institute of Inorganic Chemistry, University of Cologne, Greinstr. 6, 50939, Cologne, Germany

<sup>c</sup>Korea Institute of Science and Technology, Hwarangro 14Gil 5, 136-791, Seoul, Korea

<sup>d</sup>Department of Applied Chemistry, Kyungpook National University, Daegu, 41566, Korea

<sup>e</sup>Department of Materials Science and Engineering, Chosun University, Gwangju, 61452, Korea

<sup>f</sup>Energy Storage Materials Center, Korea Institute of Ceramic Engineering and Technology, Jinju, 52851, Korea. E-mail: jchoi@kicet.re.kr

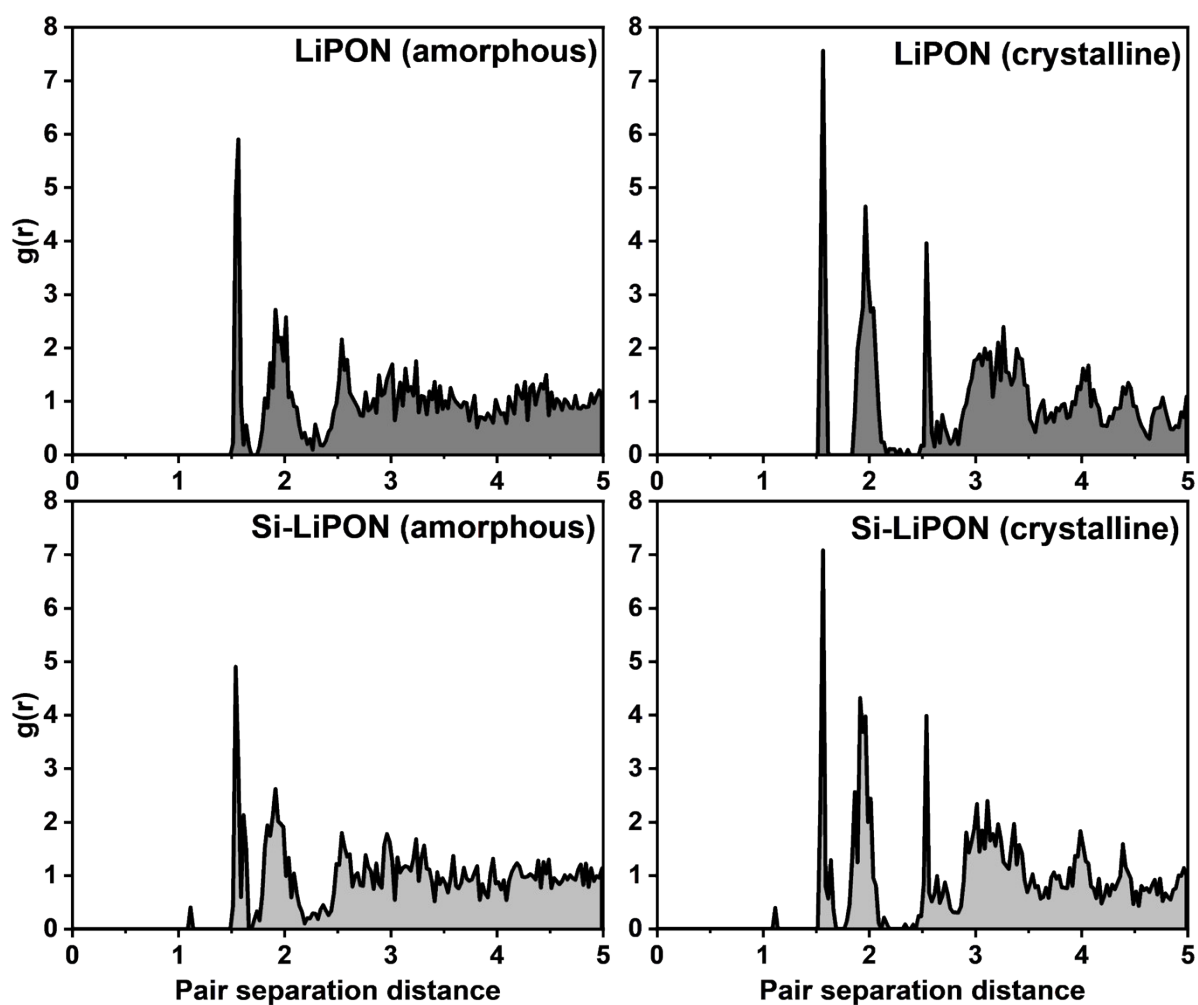

**Figure S1.** The radial distribution function  $g(r)$  of amorphous LiPON, Si-LiPON and crystalline LiPON, Si-LiPON.

The radial distribution function  $g(r)$  represents the mean number of atoms in a shell of width  $dr$  at distance  $r$  can be obtained by using following equation,

$$g(r) = p(r)(\rho 4\pi r^2 dr)$$

where  $p(r)$  is the pair correlation function and  $\rho$  represent the atom density.<sup>1</sup> Crystalline LiPON and Si-LiPON showed more sharp lines than amorphous LiPON and Si-LiPON, indicating amorphization was well performed after ab initio molecular dynamics (AIMD) simulations at 3000 K.

## Reference

- (1) Lee, I.-H.; Chang, K. J. Crystal Structure Prediction in a Continuous Representative Space. *Computational Materials Science* **2021**, *194*, 110436. <https://doi.org/10.1016/j.commatsci.2021.110436>.
